# Supplementary material for: Time in Therapeutic Range and Outcomes After Warfarin Initiation in Newly Diagnosed Atrial Fibrillation Patients With Renal Dysfunction
Source: PubMed Central journal article supplement — J Am Heart Assoc. 2017 Mar 1;6(3):e004925. doi: 10.1161/JAHA.116.004925 (PMC5524023; doi:10.1161/jaha.116.004925), 2017-03-01

# **SUPPLEMENTAL MATERIAL**

**Table S1. Definition of co-morbidities**

| Co-morbidities at entry                    | ICD-codes (Patient registry) occurring within the last 5 years or or ATC-code (Swedish Drug Prescription registry) within the last 6 months to study entry |
|--------------------------------------------|------------------------------------------------------------------------------------------------------------------------------------------------------------|
| Heart failure                              | I50, I110, I130, I132, I255, K761, I42-43 and purchase of diuretics (ATC: C03)                                                                             |
| Valvular disease                           | I342, I050, I052, Q232, Z952                                                                                                                               |
| Other valvular disease                     | I34-39 except I342, Z953                                                                                                                                   |
| Prosthetic heart valve (biological)        | Z953                                                                                                                                                       |
| Prosthetic heart valve (mechanic)          | Z952                                                                                                                                                       |
| Pacemaker or ICD                           | Z950, Z450 or procedure code FPE                                                                                                                           |
| Hypertension                               | I10-15 or purchase of antihypertensive drugs (ATC: C02)                                                                                                    |
| Diabetes                                   | E10-14 or purchase of antidiabetic drugs (ATC:A10)                                                                                                         |
| Liver disease                              | K70-77 or procedure codes JJB, JJC                                                                                                                         |
| Chronic obstructive pulmonary disease      | J43-44                                                                                                                                                     |
| Cancer                                     | Any diagnosis in the C domain of ICD-10                                                                                                                    |
| Alcohol use, via the Swedish alcohol index | E244, F10, G312, G621, G721, I426, K292, K70, K860, O354, P043, Q860, T51, Y90-91, Z502, Z714                                                              |
| Dementia                                   | F00-03                                                                                                                                                     |
| Intracranial bleeding                      | I60-62, S064-066, I690-692                                                                                                                                 |
| Gastrointestinal bleeding                  | I850, I983, K226, K250, K252, K254, K256, K260, K262, K264, K266, K270, K272, K274, K276, K280, K284, K286, K290, K625, K661, K920, K921, K922             |
| Urogenital bleeding                        | N02, R319, N95                                                                                                                                             |
| Other bleeding                             | H431, R04, R58, D629, or procedure code DR029                                                                                                              |
| Coagulation or platelet defect             | D65-69                                                                                                                                                     |
| Anaemia                                    | D50-64                                                                                                                                                     |
| Ischaemic stroke                           | I63, I693                                                                                                                                                  |
| Unspecified stroke                         | I64, I694                                                                                                                                                  |
| Transient ischaemic attack                 | G45                                                                                                                                                        |
| Peripheral systemic embolism               | I74                                                                                                                                                        |
| Composite thromboembolism                  | I63-64, G45, I74, I693, I694                                                                                                                               |
| Pulmonary embolism                         | I26                                                                                                                                                        |
| Deep venous thrombosis                     | I801-802                                                                                                                                                   |
| Composite venous thromboembolism           | I26, I801-802                                                                                                                                              |
| Myocardial infarction                      | I21, I252                                                                                                                                                  |
| Ischaemic heart disease                    | I20-25                                                                                                                                                     |
| PCI-procedure procedure code               | FNG                                                                                                                                                        |
| CABG-procedure procedure codes             | FNA, FNB, FNC, FND, FNE, FNF, FNH                                                                                                                          |
| Peripheral arterial disease                | I70-73                                                                                                                                                     |
| Vascular disease                           | I21, I252, I70-73                                                                                                                                          |

**Table S2. Medication collected from the pharmacy obtained from the Swedish Drug Prescription Registry**

| <b>Exposure medication</b>                                                                                    | <b>ATC-code (Swedish Drug Prescriptioin registry)</b> |
|---------------------------------------------------------------------------------------------------------------|-------------------------------------------------------|
| Warfarin                                                                                                      | B01AA03                                               |
| <b>Medication use at study inclusion date (first warfarin purchase-date) or within the preceding 6 months</b> | <b>ATC-code</b>                                       |
| Aspirin                                                                                                       | B01AC06                                               |
| Clopidogrel                                                                                                   | B01AC04                                               |
| Dipyridamole                                                                                                  | B01AC07                                               |
| NSAID                                                                                                         | M01A                                                  |
| Paracetamol                                                                                                   | N02BE01                                               |
| Statins                                                                                                       | C10AA                                                 |
| Antidepressant: Selective Serotonin Re-uptake inhibitor (SSRI)                                                | N06AB                                                 |
| Proton pump inhibitor                                                                                         | A02BC                                                 |
| Amiodarone                                                                                                    | C01BD01                                               |
| Macrolide                                                                                                     | J01FA                                                 |
| Quinolone                                                                                                     | J01M                                                  |
| Combinations of sulfonamides and trimethoprim                                                                 | J01EE                                                 |

**Table S3. Definition of CHA<sub>2</sub>DS<sub>2</sub>-VASc and HAS-BLED score**

| <b>CHA<sub>2</sub>DS<sub>2</sub>-VASc score</b>                                                                             | <b>Points</b> | <b>ICD-codes from Patient registry<br/>ATC-codes from Drug Prescription registry</b>                                                                                                                                                                                                                                                   |
|-----------------------------------------------------------------------------------------------------------------------------|---------------|----------------------------------------------------------------------------------------------------------------------------------------------------------------------------------------------------------------------------------------------------------------------------------------------------------------------------------------|
| Congestive heart failure                                                                                                    | 1 point       | I10-15 or purchase of antihypertensive drugs (ATC: C02)                                                                                                                                                                                                                                                                                |
| Hypertension                                                                                                                | 1 point       | I10-15 or purchase of antihypertensive drugs (ATC: C02)                                                                                                                                                                                                                                                                                |
| Age >75 years                                                                                                               | 2 points      |                                                                                                                                                                                                                                                                                                                                        |
| Diabetes                                                                                                                    | 1 point       | E10-14 or purchase of antidiabetic drugs (ATC:A10)                                                                                                                                                                                                                                                                                     |
| Stroke/Transient ischemic attack/<br>Unspecified stroke/ Systemic thromboembolism/Pulmonary embolism/Deep venous thrombosis | 2 point       | Stroke/TIA: I63, I693, I64, I694, G45<br>Peripheral/systemic embolism: I74, I63-64, G45, I74, I693, I694, I26, I801-802                                                                                                                                                                                                                |
| Vascular disease                                                                                                            | 1 point       | Previous MI/Ischemic heart disease: I21,I252, I21,I252<br>Vascular disease: I21, I252, I70-73<br>Peripheral arterial disease: I70-73                                                                                                                                                                                                   |
| Age 65-75 years                                                                                                             | 1 point       |                                                                                                                                                                                                                                                                                                                                        |
| Sex Category: female gender                                                                                                 | 1 point       |                                                                                                                                                                                                                                                                                                                                        |
| <b>HAS-BLED score</b>                                                                                                       | <b>Points</b> |                                                                                                                                                                                                                                                                                                                                        |
| Hypertension                                                                                                                | 1 point       | I10-15 or purchase of antihypertensive drugs (ATC: C02)                                                                                                                                                                                                                                                                                |
| Abnormal liver och renal function                                                                                           | 1 or 2 points | Liver disease: K70-77 or procedure codes JJB, JJC<br>Renal function: estimated glomerular filtration rate $\leq$ 60 ml/min/1.73 m <sup>2</sup> /or dialysis                                                                                                                                                                            |
| Stroke                                                                                                                      | 1 point       | Ischemic stroke: I63, I693<br>Unspecified stroke: I64, I694                                                                                                                                                                                                                                                                            |
| Bleeding                                                                                                                    | 1 point       | Intracranial bleeding: I60-62, S064-066, I690-692<br>Gastrointestinal bleeding: I850, I983, K226, K250, K252, K254, K256, K260, K262, K264, K266, K270, K272, K274, K276, K280, K284, K286, K290, K625, K661, K920, K921, K922<br>Urogenital bleeding: N02, R319, N95<br>Other bleeding: H431, R04, R58, D629, or procedure code DR029 |
| Labile INR (TTR<60%)                                                                                                        | 1 point       | Not available (all included patients were 1st time warfarin users)                                                                                                                                                                                                                                                                     |
| Elderly (age $\geq$ 65 years)                                                                                               | 1 point       |                                                                                                                                                                                                                                                                                                                                        |
| Drugs or alcohol abuse                                                                                                      | 1 or 2 points | Antiplatelet/NSAID: ATC-code: B01/M01A<br>Alcohol abuse: E244, F10, G312, G621, G721, I426, K292, K70, K860, O354, P043, Q860, T51, Y90-91, Z502, Z714                                                                                                                                                                                 |

**Table S4. Definition of events during follow-up**

| <b>Definition of outcomes during follow-up</b> | <b>ICD 10-code (Patient registry)</b> |
|------------------------------------------------|---------------------------------------|
| Intracranial bleeding                          | I60-62, S064-066, I690-692            |
| Ischemic stroke                                | I63, I693                             |
| Myocardial infarction                          | I21, I252                             |
|                                                | Population-registry                   |
| Death                                          | Date of death                         |

**Table S5.** Sensitivity analysis (TTR based on first 90 days): Time-in-therapeutic range (TTR) in the different renal function categories

|                                                      | All          | eGFR $\geq$ 60 | eGFR 45-59  | eGFR 30-44  | eGFR <30 or dialysis | p-value |
|------------------------------------------------------|--------------|----------------|-------------|-------------|----------------------|---------|
| N                                                    | 7577         | 5596           | 1324        | 495         | 162                  |         |
| TTR %, median (IQR)                                  | 82 (64-96)   | 82 (65-96)     | 81 (65-97)  | 81 (61-95)  | 71 (55-86)           | <0.001  |
| TTR %, mean (SD)                                     | 77 (23)      | 77 (23)        | 77 (22)     | 75 (25)     | 68 (24)              | <0.001  |
| TTR in categories                                    |              |                |             |             |                      |         |
| TTR >75%, n (%)                                      | 4567 (60.3%) | 3409 (60.9%)   | 799 (60.3%) | 289 (58.4%) | 70 (43.2%)           | <0.001  |
| TTR 60-75%, n (%)                                    | 1486 (19.6%) | 1085 (19.4%)   | 267 (20.2%) | 93 (18.8%)  | 41 (25.3%)           |         |
| TTR <60%, n (%)                                      | 1524 (20.1%) | 1102 (19.7%)   | 258 (19.5%) | 113 (22.8%) | 51 (31.5%)           |         |
| Number of INR measurement, median (IQR)              | 8 (5-11)     | 8 (5-11)       | 8 (5-11)    | 7 (5-11)    | 8 (6-11)             | 0.240   |
| Median number of days on warfarin, median (IQR)      | 79 (67-88)   | 80 (68-85)     | 79 (66-85)  | 80 (70-85)  | 77 (63-84)           | 0.279   |
| Median (IQR) number of days passing between each INR | 9 (6-12)     | 8 (6-12)       | 9 (6-12)    | 9 (7-13)    | 9 (6-12)             | 0.079   |
| % (IQR) of INR measurements above 3                  | 0 (0-20)     | 0 (0-19)       | 8 (0-22)    | 9 (0-25)    | 9 (0-22)             | <0.001  |
| % (IQR) of INR measurements below 2                  | 20 (0-36)    | 20 (0-36)      | 20 (0-33)   | 20 (0-33)   | 29 (14-50)           | <0.001  |

**Table S6.** Sensitivity analysis (TTR based on first 90 days): Proportion of single and composite study outcomes across eGFR strata

| Level                        | eGFR $\geq$ 60 | eGFR 45-59  | eGFR 30-44 | eGFR <30 or dialysis | p-value |
|------------------------------|----------------|-------------|------------|----------------------|---------|
| <b>Single endpoints</b>      | 5596           | 1324        | 495        | 162                  |         |
| ICH                          | 45 (0.8%)      | 16 (1.2%)   | 3 (0.6%)   | 1 (0.6%)             | <0.001  |
| Ischemic stroke              | 129 (2.3%)     | 41 (3.1%)   | 13 (2.6%)  | 6 (3.7%)             |         |
| MI                           | 24 (0.4%)      | 9 (0.7%)    | 10 (2.0%)  | 1 (0.6%)             |         |
| Death                        | 208 (3.7%)     | 86 (6.5%)   | 60 (12.1%) | 31 (19.1%)           |         |
| <b>Combined endpoint</b>     |                |             |            |                      |         |
| ICH/Ischemic stroke/MI/Death | 406 (7.3%)     | 152 (11.5%) | 86 (17.4%) | 39 (24.1%)           | <0.001  |

ICH: Intracranial hemorrhage; MI: Myocardial infarction.

**Table S7. Sensitivity analysis (TTR based on first 90 days):** Multivariable Cox regression analysis of factors associated with the composite endpoint of intracranial hemorrhage, ischemic stroke, myocardial infarction and death (n=7577)

|                                                                                                        | HR (95% CI)      | p-value* |
|--------------------------------------------------------------------------------------------------------|------------------|----------|
| Renal function (ml/min/1.73m <sup>2</sup> )                                                            |                  |          |
| eGFR ≥60                                                                                               | 1.0 (ref)        |          |
| eGFR 45-59                                                                                             | 1.06 (0.87-1.29) | 0.545    |
| eGFR 30-44                                                                                             | 1.26 (0.98-1.62) | 0.074    |
| eGFR <30, or dialysis                                                                                  | 1.69 (1.20-2.39) | 0.003    |
| Time in therapeutic range (TTR)                                                                        |                  |          |
| TTR ≥75%                                                                                               | 1.0 (ref)        |          |
| TTR 60-75%                                                                                             | 1.52 (1.25-1.83) | <0.001   |
| TTR <60%                                                                                               | 1.88 (1.58-2.24) | <0.001   |
| Age (years)                                                                                            |                  |          |
| < 65 years                                                                                             | 1.0 (ref)        |          |
| 65-74 years                                                                                            | 1.56 (1.19-2.06) | 0.001    |
| 75-84 years                                                                                            | 2.75 (2.11-3.57) | <0.001   |
| ≥ 85 years                                                                                             | 3.77 (2.77-5.14) | <0.001   |
| Female                                                                                                 | 1.00 (0.85-1.16) | 0.995    |
| Diabetes                                                                                               | 1.32 (1.08-1.60) | 0.006    |
| Hypertension                                                                                           | 1.01 (0.86-1.19) | 0.890    |
| Vascular disease (prior myocardial infarction, ischemic heart disease, or peripheral arterial disease) | 1.33 (1.09-1.62) | 0.006    |
| Heart failure                                                                                          | 1.72 (1.39-2.11) | <0.001   |
| Valvular disease                                                                                       | 1.17 (0.65-2.11) | 0.595    |
| Cancer within last 3 years                                                                             | 1.22 (1.01-1.49) | 0.047    |
| Coagulation/platelet defect                                                                            | 1.19 (0.56-2.52) | 0.650    |
| Anemia                                                                                                 | 1.17 (0.86-1.58) | 0.376    |
| Ischemic stroke                                                                                        | 1.04 (0.71-1.47) | 0.832    |
| Prior systemic emboli                                                                                  | 1.11 (0.81-1.53) | 0.507    |
| Deep vein thrombosis/Pulmonary embolism                                                                | 1.52 (1.18-1.95) | 0.001    |
| Prior intracranial hemorrhage                                                                          | 1.78 (0.79-4.02) | 0.001    |
| Prior gastrointestinal bleeding                                                                        | 0.93 (0.51-1.69) | 0.807    |
| Antiplatelet therapy                                                                                   | 1.05 (0.89-1.24) | 0.549    |

\* Interaction terms tested: age and eGFR: p=0.044; age and TTR, p =0.244; eGFR and TTR, p=0.804.



**Figure S1.** Sensitivity analysis: Association of TTR and renal function to outcome. Kaplan-Meier curve: time-in-therapeutic range and association to outcome  
 Outcome is a composite of intracranial hemorrhage/ischemic stroke/myocardial infarction/death.

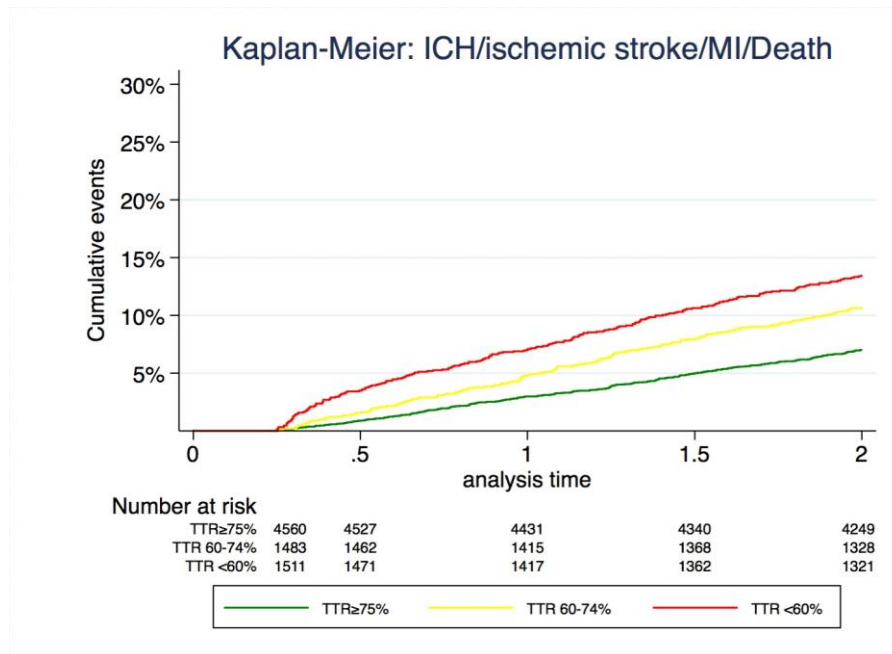

**Figure S2.** Kaplan-Meier curve for combined eGFR and TTR groups:

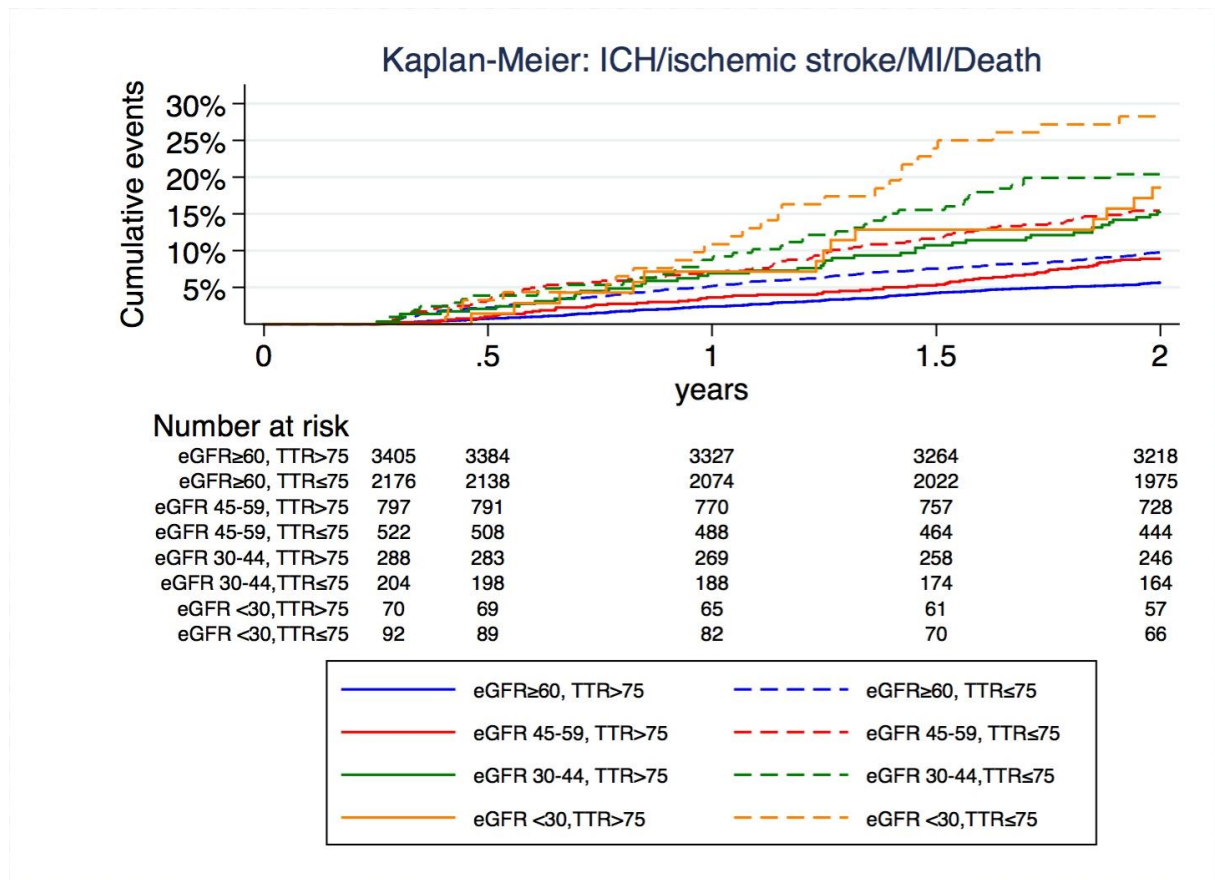

Supplement: JAH3-6-e004925-s001.pdf [file JAH3-6-e004925-s001.pdf]
